# Supplementary material for: Four hybrid compounds based on a new type of molybdates and a flexible tripodal ligand: synthesis, structures, photochemical and electrochemical properties
Source: Royal Society of Chemistry journal article supplement (doi:10.1039/c5ra13007g), 2015-01-01
Supplement: c5ra13007g1.pdf [file c5ra13007g1.pdf]

## Supplementary materials for

### Four hybrid compounds based on new type of molybdates and a flexible tripodal ligand: synthesis, structures, photochemical and electrochemical properties

Haijuan Du, Chaohai Wang, Yao Li, Yunyin Niu,\* and Hongwei Hou\*

*College of Chemistry and Molecular Engineering, Zhengzhou University, Zhengzhou 450001, P. R.*

*China. E-mail: [niuyy@zzu.edu.cn](mailto:niuyy@zzu.edu.cn), [housongw@zzu.edu.cn](mailto:housongw@zzu.edu.cn)*

**Table S1.** Selected bond distances(Å) and angles(°)for compounds **1-4**

| Compound 1                     |           |                                |            |                               |            |
|--------------------------------|-----------|--------------------------------|------------|-------------------------------|------------|
| Mo(1)-O(1)                     | 1.696(5)  | Mo(1)-O(2)                     | 1.706(5)   | Mo(1)-O(3)                    | 1.887(5)   |
| Mo(1)-O(7)                     | 2.248(4)  | Mo(1)-O(8)                     | 2.197(4)   | Mo(1)-N(1)                    | 2.189(6)   |
| Mo(2)-O(3)                     | 1.933(5)  | Mo(2)-O(4)                     | 1.694(5)   | Mo(2)-O(5)                    | 1.693(5)   |
| Mo(2)-O(6)                     | 2.297(4)  | Mo(2)-O(7)                     | 2.392(4)   | Mo(2)-O(19) <sup>1</sup>      | 1.969(5)   |
| Mo(3)-Mo(6)                    | 2.468(4)  | Mo(3)-O(7)                     | 1.835(4)   | Mo(3)-O(8)                    | 2.137(4)   |
| Mo(3)-O(9)                     | 1.751(4)  | Mo(3)-O(10)                    | 1.680(4)   | Mo(3)-O(14)                   | 2.037(4)   |
| Mo(4)-O(8)                     | 1.903(4)  | Mo(4)-O(11)                    | 1.696(5)   | Mo(4)-O(12)                   | 1.688(5)   |
| Mo(4)-O(13)                    | 1.972(4)  | Mo(4)-O(14)                    | 2.290(4)   | Mo(4)-Mo(15) <sup>1</sup>     | 2.384(4)   |
| Mo(5)-O(6) <sup>1</sup>        | 1.872(4)  | Mo(5)-O(13)                    | 2.168(4)   | Mo(5)-O(14)                   | 1.979(4)   |
| Mo(5)-O(14) <sup>1</sup>       | 2.506(4)  | Mo(5)-O(15)                    | 1.733(4)   | Mo(5)-O(16)                   | 1.679(4)   |
| Mo(6)-O(6) <sup>1</sup>        | 2.306(4)  | Mo(6)-O(9) <sup>1</sup>        | 2.321(4)   | Mo(6)-O(13)                   | 2.000(4)   |
| Mo(6)-O(17)                    | 1.696(5)  | Mo(6)-O(18)                    | 1.700(5)   | Mo(6)-O(19)                   | 1.876(5)   |
| O(6)-Mo(5) <sup>1</sup>        | 1.872(4)  | O(6)-Mo(6) <sup>1</sup>        | 2.306(4)   | O(9)-Mo(6) <sup>1</sup>       | 2.321(4)   |
| O(14)-Mo(5) <sup>1</sup>       | 2.506(4)  | O(15)-Mo(4) <sup>1</sup>       | 2.384(4)   | O(19)-Mo(2) <sup>1</sup>      | 1.969(5)   |
| O(1)-Mo(1)-O(2)                | 105.0(3)  | O(1)-Mo(1)-O(3)                | 103.3(2)   | O(1)-Mo(1)-O(7)               | 161.3(2)   |
| O(1)-Mo(1)-O(8)                | 91.7(2)   | O(1)-Mo(1)-N(1)                | 94.0(2)    | O(2)-Mo(1)-O(3)               | 101.6(2)   |
| O(2)-Mo(1)-O(7)                | 93.1(2)   | O(2)-Mo(1)-O(8)                | 158.3(2)   | O(2)-Mo(1)-N(1)               | 86.1(2)    |
| O(3)-Mo(1)-O(7)                | 76.85(18) | O(3)-Mo(1)-O(8)                | 87.60(19)  | O(3)-Mo(1)-N(1)               | 158.4(2)   |
| O(8)-Mo(1)-O(7)                | 69.61(15) | N(1)-Mo(1)-O(7)                | 82.58(18)  | N(1)-Mo(1)-O(8)               | 78.90(19)  |
| O(3)-Mo(2)-O(6)                | 83.87(18) | O(3)-Mo(2)-O(7)                | 72.54(17)  | O(3)-Mo(2)-O(19) <sup>1</sup> | 148.92(18) |
| O(4)-Mo(2)-O(3)                | 100.9(3)  | O(4)-Mo(2)-O(6)                | 161.9(2)   | O(4)-Mo(2)-O(19) <sup>1</sup> | 96.2(3)    |
| O(5)-Mo(2)-O(3)                | 99.8(2)   | O(5)-Mo(2)-O(4)                | 105.3(3)   | O(5)-Mo(2)-O(6)               | 90.8(2)    |
| O(5)-Mo(2)-O(7)                | 161.4(2)  | O(5)-Mo(2)-O(19) <sup>1</sup>  | 100.5(2)   | O(6)-Mo(2)-O(7)               | 71.79(15)  |
| O(19) <sup>1</sup> -Mo(2)-O(6) | 72.51(17) | O(19) <sup>1</sup> -Mo(2)-O(7) | 80.92(17)  | O(7)-Mo(3)-O(6)               | 77.95(17)  |
| O(7)-Mo(3)-O(8)                | 79.03(18) | O(7)-Mo(3)-O(14)               | 143.49(18) | O(8)-Mo(3)-O(6)               | 79.37(15)  |
| O(9)-Mo(3)-O(6)                | 76.54(17) | O(9)-Mo(3)-O(7)                | 102.6(2)   | O(9)-Mo(3)-O(8)               | 154.88(19) |
| O(9)-Mo(3)-O(14)               | 94.16(18) | O(10)-Mo(3)-O(6)               | 175.48(19) | O(10)-Mo(3)-O(7)              | 106.3(2)   |
| O(10)-Mo(3)-O(8)               | 99.78(19) | O(10)-Mo(3)-O(14)              | 100.76(19) | O(14)-Mo(3)-O(6)              | 74.74(14)  |

|                                              |            |                                             |            |                                 |            |
|----------------------------------------------|------------|---------------------------------------------|------------|---------------------------------|------------|
| O(14)-Mo(3)-O(8)                             | 72.53(16)  | O(8)-Mo(4)-O(13)                            | 140.76(17) | O(8)-Mo(4)-O(14)                | 71.51(16)  |
| O(8)-Mo(4)-O(15) <sup>1</sup>                | 82.71(17)  | O(11)-Mo(4)-O(8)                            | 99.5(2)    | O(11)-Mo(4)-O(13)               | 95.6(2)    |
| O(11)-Mo(4)-O(14)                            | 102.8(2)   | O(11)-Mo(4)-O(15) <sup>1</sup>              | 171.6(2)   | O(12)-Mo(4)-O(8)                | 106.8(2)   |
| O(12)-Mo(4)-O(11)                            | 104.0(3)   | O(12)-Mo(4)-O(13)                           | 104.2(2)   | O(12)-Mo(4)-O(14)               | 153.1(2)   |
| O(12)-Mo(4)- O(15) <sup>1</sup>              | 82.9(2)    | O(13)-Mo(4)-O(14)                           | 69.90(15)  | O(13)-Mo(4)- O(15) <sup>1</sup> | 77.91(16)  |
| O(14)-Mo(4)- O(15) <sup>1</sup>              | 70.16(14)  | O(6) <sup>1</sup> -Mo(5)-O(13)              | 75.72(17)  | O(6) <sup>1</sup> -Mo(5)-O(14)  | 141.28(17) |
| O(6) <sup>1</sup> -Mo(5)- O(14) <sup>1</sup> | 76.49(15)  | O(13)-Mo(5)- O(14) <sup>1</sup>             | 78.27(14)  | O(14)-Mo(5)- O(13)              | 72.47(15)  |
| O(14)-Mo(5)- O(14) <sup>1</sup>              | 75.93(17)  | O(15)-Mo(5)- O(6) <sup>1</sup>              | 101.5(2)   | O(15)-Mo(5)- O(13)              | 154.30(18) |
| O(15)-Mo(5)- O(14) <sup>1</sup>              | 76.28(16)  | O(15)-Mo(5)- O(14)                          | 97.72(18)  | O(16)-Mo(5)- O(6) <sup>1</sup>  | 104.9(2)   |
| O(16)-Mo(5)- O(13)                           | 101.6(2)   | O(16)-Mo(5)- O(14)                          | 102.6(2)   | O(16)-Mo(5)- O(14) <sup>1</sup> | 178.5(2)   |
| O(16)-Mo(5)- O(15)                           | 103.7(2)   | O(6) <sup>1</sup> -Mo(6)- O(9) <sup>1</sup> | 70.56(15)  | O(13) -Mo(6)- O(6) <sup>1</sup> | 70.26(16)  |
| O(13)-Mo(6)- O(9) <sup>1</sup>               | 78.07(16)  | O(17)-Mo(6)- O(6) <sup>1</sup>              | 156.4(2)   | O(17)-Mo(6)- O(9) <sup>1</sup>  | 85.9(2)    |
| O(17)-Mo(6)- O(13)                           | 104.0(2)   | O(17)-Mo(6)- O(18)                          | 105.1(3)   | O(17)-Mo(6)- O(19)              | 105.2(3)   |
| O(18)-Mo(6)- O(6) <sup>1</sup>               | 98.2(2)    | O(18)-Mo(6)- O(9) <sup>1</sup>              | 168.2(2)   | O(18)-Mo(6)- O(13)              | 94.8(2)    |
| O(18)-Mo(6)- O(19)                           | 98.9(2)    | O(19)-Mo(6)- O(6) <sup>1</sup>              | 73.87(18)  | O(19)-Mo(6)- O(9) <sup>1</sup>  | 81.90(18)  |
| O(19)-Mo(6)- O(13)                           | 143.02(19) |                                             |            |                                 |            |

### Compound 2

|                                            |            |                                             |            |                                             |            |
|--------------------------------------------|------------|---------------------------------------------|------------|---------------------------------------------|------------|
| Mo(1)-O(2)                                 | 1.926(4)   | Mo(1)-O(3)                                  | 1.719(4)   | Mo(1)-O(4) <sup>1</sup>                     | 2.205(4)   |
| Mo(1)-O(4)                                 | 1.947(4)   | Mo(1)-O(5)                                  | 1.703(5)   | Mo(1)-N(4) <sup>2</sup>                     | 2.471(5)   |
| Mo(2)-O(1) <sup>3</sup>                    | 1.841(4)   | Mo(2)-O(2)                                  | 2.083(4)   | Mo(2)-O(4) <sup>1</sup>                     | 2.014(4)   |
| Mo(2)-O(6)                                 | 1.709(5)   | Mo(2)-O(7)                                  | 1.702(5)   | Zn(1)-Zn(1) <sup>3</sup>                    | 3.1467(14) |
| Zn(1)-O(1) <sup>3</sup>                    | 2.048(5)   | Zn(1)-O(1)                                  | 2.082(4)   | Zn(1)-O(2)                                  | 2.115(4)   |
| Zn(1)-N(2)                                 | 1.999(5)   | Zn(1)-N(6) <sup>3</sup>                     | 1.999(5)   | O(1)-Mo(2) <sup>3</sup>                     | 1.842(4)   |
| O(1)- Zn(1) <sup>3</sup>                   | 2.048(4)   | O(4)- Mo(1) <sup>1</sup>                    | 2.205(4)   | O(4)- Mo(2) <sup>1</sup>                    | 2.014(4)   |
| N(4)- Mo(1) <sup>4</sup>                   | 2.471(5)   | N(6)- Zn(1) <sup>3</sup>                    | 1.999(5)   |                                             |            |
| O(2)-Mo(1)-O(4) <sup>1</sup>               | 72.60(17)  | O(2)-Mo(1)-O(4)                             | 141.6(2)   | O(2)-Mo(1)-N(4) <sup>2</sup>                | 79.22(18)  |
| O(3)-Mo(1)-O(2)                            | 103.9(2)   | O(3)-Mo(1)-O(4) <sup>1</sup>                | 161.64(19) | O(3)-Mo(1)-O(4)                             | 104.04(19) |
| O(3)-Mo(1)-N(4) <sup>2</sup>               | 82.3(2)    | O(4)-Mo(1)-O(4) <sup>1</sup>                | 72.54(17)  | O(4)-Mo(1)-N(4) <sup>2</sup>                | 78.98(18)  |
| O(4) <sup>1</sup> -Mo(1)-N(4) <sup>2</sup> | 79.31(17)  | O(5)-Mo(1)-O(2)                             | 98.7(2)    | O(5)-Mo(1)-O(3)                             | 102.8(2)   |
| O(5)-Mo(1)-O(4)                            | 100.2(2)   | O(5)-Mo(1)- O(4) <sup>1</sup>               | 95.60(19)  | O(5)-Mo(1)- N(4) <sup>2</sup>               | 174.9(2)   |
| O(1) <sup>3</sup> -Mo(2)-O(2)              | 76.54(18)  | O(1) <sup>3</sup> -Mo(2)-O(4) <sup>1</sup>  | 149.8(2)   | O(4) <sup>1</sup> -Mo(2)-O(2)               | 73.63(17)  |
| O(6) -Mo(2)-O(1) <sup>3</sup>              | 102.0(2)   | O(6) -Mo(2)-O(2)                            | 118.2(2)   | O(6) -Mo(2)-O(4) <sup>1</sup>               | 96.4(2)    |
| O(7) -Mo(2)-O(1) <sup>3</sup>              | 101.1(2)   | O(7) -Mo(2)-O(2)                            | 133.4(2)   | O(7) -Mo(2)-O(4) <sup>1</sup>               | 95.7(2)    |
| O(7) -Mo(2)-O(6)                           | 107.9(3)   | O(1) <sup>3</sup> -Zn(1)-Zn(1) <sup>3</sup> | 40.76(12)  | O(1)-Zn(1)-Zn(1) <sup>3</sup>               | 39.96(12)  |
| O(1) <sup>3</sup> -Zn(1)-O(1)              | 80.72(18)  | O(1) <sup>3</sup> -Zn(1)-O(2)               | 71.69(17)  | O(1)-Zn(1)-O(2)                             | 152.38(19) |
| O(2)-Zn(1)-Zn(1) <sup>3</sup>              | 112.44(12) | N(2)-Zn(1)-Zn(1) <sup>3</sup>               | 114.36(16) | N(2)-Zn(1)-O(1)                             | 95.2(2)    |
| N(2)-Zn(1)-O(1) <sup>3</sup>               | 112.8(2)   | N(2)-Zn(1)-O(2)                             | 98.57(19)  | N(6) <sup>3</sup> -Zn(1)-Zn(1) <sup>3</sup> | 112.27(16) |
| N(6) <sup>3</sup> -Zn(1)-O(1)              | 96.9(2)    | N(6) <sup>3</sup> -Zn(1)- O(1) <sup>3</sup> | 117.4(2)   | N(6) <sup>3</sup> -Zn(1)-O(2)               | 96.8(2)    |
| N(6) <sup>3</sup> -Zn(1)-N(2)              | 119.8(2)   |                                             |            |                                             |            |

### Compound 3

|               |          |              |          |              |          |
|---------------|----------|--------------|----------|--------------|----------|
| Cd(1)-O(14)#1 | 2.229(4) | Cd(1)-O(14)  | 2.229(4) | Cd(1)-O(6)#1 | 2.268(3) |
| Cd(1)-O(6)    | 2.268(3) | Cd(1)-O(3)#1 | 2.317(3) | Cd(1)-O(3)   | 2.317(3) |
| Mo(1)-O(4)    | 1.688(3) | Mo(1)-O(3)   | 1.741(3) | Mo(1)-O(5)   | 1.914(3) |

|                      |            |                      |            |                     |            |
|----------------------|------------|----------------------|------------|---------------------|------------|
| Mo(1)-O(2)           | 1.940(3)   | Mo(1)-O(10)#2        | 2.226(3)   | Mo(1)-O(1)          | 2.485(3)   |
| Mo(2)-O(7)           | 1.692(3)   | Mo(2)-O(6)           | 1.733(3)   | Mo(2)-O(2)          | 1.893(3)   |
| Mo(2)-O(8)           | 1.983(3)   | Mo(2)-O(11)#2        | 2.296(3)   | Mo(2)-O(1)          | 2.362(3)   |
| Mo(3)-O(9)           | 1.694(3)   | Mo(3)-O(10)          | 1.756(3)   | Mo(3)-O(8)          | 1.958(3)   |
| Mo(3)-O(11)          | 1.969(3)   | Mo(3)-O(1)           | 2.137(3)   | Mo(3)-O(1)#2        | 2.349(3)   |
| Mo(4)-O(13)          | 1.695(3)   | Mo(4)-O(12)          | 1.716(3)   | Mo(4)-O(5)          | 1.905(3)   |
| Mo(4)-O(11)          | 2.014(3)   | Mo(4)-O(1)           | 2.319(3)   | Mo(4)-O(8)#2        | 2.334(3)   |
| Mo(5)-O(17)          | 1.697(3)   | Mo(5)-O(18)          | 1.707(3)   | Mo(5)-O(19)         | 1.913(3)   |
| Mo(5)-O(16)          | 1.913(3)   | Mo(5)-O(15)          | 2.434(3)   | Mo(5)-O(25)#3       | 2.469(3)   |
| Mo(6)-O(21)          | 1.705(3)   | Mo(6)-O(20)          | 1.708(3)   | Mo(6)-O(19)         | 1.904(3)   |
| Mo(6)-O(22)          | 1.916(3)   | Mo(6)-O(15)          | 2.440(3)   | Mo(6)-O(27)#3       | 2.449(3)   |
| Mo(7)-O(24)          | 1.701(3)   | Mo(7)-O(23)          | 1.707(3)   | Mo(7)-O(16)#3       | 1.914(3)   |
| Mo(7)-O(22)          | 1.920(3)   | Mo(7)-O(25)          | 2.411(3)   | Mo(7)-O(27)#3       | 2.432(3)   |
| Mo(8)-O(26)          | 1.709(3)   | Mo(8)-O(15)          | 1.790(3)   | Mo(8)-O(27)         | 1.794(3)   |
| Mo(8)-O(25)          | 1.791(3)   | O(1)-Mo(3)#2         | 2.349(3)   | O(8)-Mo(4)#2        | 2.334(3)   |
| O(10)-Mo(1)#2        | 2.226(3)   | O(11)-Mo(2)#2        | 2.296(3)   | O(16)-Mo(7)#3       | 1.914(3)   |
| O(25)-Mo(5)#3        | 2.469(3)   | O(27)-Mo(7)#3        | 2.432(3)   | O(27)-Mo(6)#3       | 2.449(3)   |
| O(14)#1-Cd(1)-O(14)  | 180.00(17) | O(14)#1-Cd(1)-O(6)#1 | 91.65(13)  | O(14)-Cd(1)-O(6)#1  | 88.35(13)  |
| O(14)#1-Cd(1)-O(6)   | 88.35(13)  | O(14)-Cd(1)-O(6)     | 91.65(13)  | O(6)#1-Cd(1)-O(6)   | 180.000(1) |
| O(14)#1-Cd(1)-O(3)#1 | 85.75(13)  | O(14)-Cd(1)-O(3)#1   | 94.25(13)  | O(6)#1-Cd(1)-O(3)#1 | 82.55(11)  |
| O(6)-Cd(1)-O(3)#1    | 97.45(11)  | O(14)#1-Cd(1)-O(3)   | 94.25(13)  | O(14)-Cd(1)-O(3)    | 85.75(13)  |
| O(6)#1-Cd(1)-O(3)    | 97.45(11)  | O(6)-Cd(1)-O(3)      | 82.55(11)  | O(3)#1-Cd(1)-O(3)   | 180.000(1) |
| O(4)-Mo(1)-O(3)      | 104.93(16) | O(4)-Mo(1)-O(5)      | 103.50(15) | O(3)-Mo(1)-O(5)     | 98.94(14)  |
| O(4)-Mo(1)-O(2)      | 103.78(15) | O(3)-Mo(1)-O(2)      | 94.97(14)  | O(5)-Mo(1)-O(2)     | 144.88(13) |
| O(4)-Mo(1)-O(10)#2   | 93.36(14)  | O(3)-Mo(1)-O(10)#2   | 161.52(13) | O(5)-Mo(1)-O(10)#2  | 78.92(12)  |
| O(2)-Mo(1)-O(10)#2   | 77.81(12)  | O(4)-Mo(1)-O(1)      | 162.96(14) | O(3)-Mo(1)-O(1)     | 92.11(12)  |
| O(5)-Mo(1)-O(1)      | 73.68(11)  | O(2)-Mo(1)-O(1)      | 73.73(11)  | O(10)#2-Mo(1)-O(1)  | 69.60(10)  |
| O(7)-Mo(2)-O(6)      | 104.56(16) | O(7)-Mo(2)-O(2)      | 101.35(15) | O(6)-Mo(2)-O(2)     | 99.44(14)  |
| O(7)-Mo(2)-O(8)      | 102.41(14) | O(6)-Mo(2)-O(8)      | 97.47(14)  | O(2)-Mo(2)-O(8)     | 146.19(13) |
| O(7)-Mo(2)-O(11)#2   | 91.82(13)  | O(6)-Mo(2)-O(11)#2   | 162.53(13) | O(2)-Mo(2)-O(11)#2  | 82.93(12)  |
| O(8)-Mo(2)-O(11)#2   | 72.64(11)  | O(7)-Mo(2)-O(1)      | 163.99(13) | O(6)-Mo(2)-O(1)     | 91.32(13)  |
| O(2)-Mo(2)-O(1)      | 77.57(12)  | O(8)-Mo(2)-O(1)      | 72.96(11)  | O(11)#2-Mo(2)-O(1)  | 72.18(10)  |
| O(9)-Mo(3)-O(10)     | 105.00(15) | O(9)-Mo(3)-O(8)      | 101.58(14) | O(10)-Mo(3)-O(8)    | 96.11(13)  |
| O(9)-Mo(3)-O(11)     | 100.59(14) | O(10)-Mo(3)-O(11)    | 96.91(13)  | O(8)-Mo(3)-O(11)    | 150.35(12) |
| O(9)-Mo(3)-O(1)      | 98.88(13)  | O(10)-Mo(3)-O(1)     | 156.12(12) | O(8)-Mo(3)-O(1)     | 78.74(11)  |
| O(11)-Mo(3)-O(1)     | 78.59(11)  | O(9)-Mo(3)-O(1)#2    | 174.27(13) | O(10)-Mo(3)-O(1)#2  | 80.73(12)  |
| O(8)-Mo(3)-O(1)#2    | 77.60(11)  | O(11)-Mo(3)-O(1)#2   | 78.37(11)  | O(1)-Mo(3)-O(1)#2   | 75.39(12)  |
| O(13)-Mo(4)-O(12)    | 104.75(16) | O(13)-Mo(4)-O(5)     | 101.17(14) | O(12)-Mo(4)-O(5)    | 101.09(15) |
| O(13)-Mo(4)-O(11)    | 100.60(14) | O(12)-Mo(4)-O(11)    | 96.22(14)  | O(5)-Mo(4)-O(11)    | 147.59(12) |

|                       |            |                     |            |                     |            |
|-----------------------|------------|---------------------|------------|---------------------|------------|
| O(13)-Mo(4)-O(1)      | 160.39(13) | O(12)-Mo(4)-O(1)    | 94.57(13)  | O(5)-Mo(4)-O(1)     | 77.97(11)  |
| O(11)-Mo(4)-O(1)      | 73.50(11)  | O(13)-Mo(4)-O(8)#2  | 88.96(13)  | O(12)-Mo(4)-O(8)#2  | 163.18(13) |
| O(5)-Mo(4)-O(8)#2     | 85.40(12)  | O(11)-Mo(4)-O(8)#2  | 71.29(11)  | O(1)-Mo(4)-O(8)#2   | 71.42(10)  |
| O(17)-Mo(5)-O(18)     | 105.71(17) | O(17)-Mo(5)-O(19)   | 103.54(16) | O(18)-Mo(5)-O(19)   | 100.41(15) |
| O(17)-Mo(5)-O(16)     | 100.27(16) | O(18)-Mo(5)-O(16)   | 101.15(16) | O(19)-Mo(5)-O(16)   | 141.95(14) |
| O(17)-Mo(5)-O(15)     | 89.87(14)  | O(18)-Mo(5)-O(15)   | 164.03(15) | O(19)-Mo(5)-O(15)   | 71.90(12)  |
| O(16)-Mo(5)-O(15)     | 78.96(12)  | O(17)-Mo(5)-O(25)#3 | 165.66(15) | O(18)-Mo(5)-O(25)#3 | 87.77(14)  |
| O(19)-Mo(5)-O(25)#3   | 78.21(12)  | O(16)-Mo(5)-O(25)#3 | 71.73(12)  | O(15)-Mo(5)-O(25)#3 | 77.05(11)  |
| O(21)-Mo(6)-O(20)     | 105.78(17) | O(21)-Mo(6)-O(19)   | 100.31(15) | O(20)-Mo(6)-O(19)   | 102.27(16) |
| O(21)-Mo(6)-O(22)     | 102.68(16) | O(20)-Mo(6)-O(22)   | 100.01(15) | O(19)-Mo(6)-O(22)   | 142.04(13) |
| O(21)-Mo(6)-O(15)     | 165.32(14) | O(20)-Mo(6)-O(15)   | 88.26(14)  | O(19)-Mo(6)-O(15)   | 71.90(12)  |
| O(22)-Mo(6)-O(15)     | 78.51(12)  | O(21)-Mo(6)-O(27)#3 | 89.43(15)  | O(20)-Mo(6)-O(27)#3 | 164.28(14) |
| O(19)-Mo(6)-O(27)#3   | 78.33(12)  | O(22)-Mo(6)-O(27)#3 | 72.15(12)  | O(15)-Mo(6)-O(27)#3 | 76.93(11)  |
| O(24)-Mo(7)-O(23)     | 105.35(18) | O(24)-Mo(7)-O(16)#3 | 102.94(16) | O(23)-Mo(7)-O(16)#3 | 100.36(15) |
| O(24)-Mo(7)-O(22)     | 99.90(16)  | O(23)-Mo(7)-O(22)   | 100.60(15) | O(16)#3-Mo(7)-O(22) | 143.47(14) |
| O(24)-Mo(7)-O(25)     | 90.40(15)  | O(23)-Mo(7)-O(25)   | 164.05(15) | O(16)#3-Mo(7)-O(25) | 73.11(12)  |
| O(22)-Mo(7)-O(25)     | 78.65(12)  | O(24)-Mo(7)-O(27)#3 | 166.31(15) | O(23)-Mo(7)-O(27)#3 | 87.47(15)  |
| O(16)#3-Mo(7)-O(27)#3 | 78.91(12)  | O(22)-Mo(7)-O(27)#3 | 72.50(12)  | O(25)-Mo(7)-O(27)#3 | 77.07(11)  |
| O(26)-Mo(8)-O(15)     | 109.40(16) | O(26)-Mo(8)-O(27)   | 109.27(16) | O(15)-Mo(8)-O(27)   | 109.21(15) |
| O(26)-Mo(8)-O(25)     | 109.75(16) | O(15)-Mo(8)-O(25)   | 109.49(15) | O(27)-Mo(8)-O(25)   | 109.71(15) |

**Compound 4**

|                               |            |                          |            |                              |            |
|-------------------------------|------------|--------------------------|------------|------------------------------|------------|
| Mo(1)- O(1)                   | 1.704(3)   | Mo(1)- O(2)              | 1.691(3)   | Mo(1)- O(3)                  | 1.917(3)   |
| Mo(1)- O(6)                   | 2.429(3)   | Mo(1)- O(9) <sup>1</sup> | 1.906(3)   | Mo(1)- O(11) <sup>1</sup>    | 2.399(3)   |
| Mo(2)- O(3)                   | 1.910(3)   | Mo(2)- O(4)              | 1.711(3)   | Mo(2)- O(5)                  | 1.702(3)   |
| Mo(2)- O(6)                   | 2.455(3)   | Mo(2)- O(7)              | 1.895(3)   | Mo(2)- O(13) <sup>1</sup>    | 2.448(3)   |
| Mo(3)- O(7)                   | 1.917(3)   | Mo(3)- O(8)              | 1.702(3)   | Mo(3)- O(9)                  | 1.915(3)   |
| Mo(3)- O(10)                  | 1.698(3)   | Mo(3)- O(11)             | 2.464(3)   | Mo(3)- O(13) <sup>1</sup>    | 2.422(3)   |
| Mo(4)- O(6)                   | 1.791(3)   | Mo(4)- O(11)             | 1.793(3)   | Mo(4)- O(12)                 | 1.707(3)   |
| Mo(4)- O(13)                  | 1.784(3)   | O(9)-Mo(1) <sup>1</sup>  | 1.906(3)   | O(11)-Mo(1) <sup>1</sup>     | 2.399(3)   |
| O(13)-Mo(2) <sup>1</sup>      | 2.448(3)   | O(13)-Mo(3) <sup>1</sup> | 2.422(3)   | Mo(5)- O(14)                 | 1.739(3)   |
| Mo(5)- O(15)                  | 1.689(3)   | Mo(5)- O(16)             | 1.911(3)   | Mo(5)- O(17)                 | 2.229(3)   |
| Mo(5)- O(19) <sup>2</sup>     | 2.476(3)   | Mo(5)- O(26)             | 1.932(3)   | Mo(6)- Mo(7)                 | 3.2151(5)  |
| Mo(6)- O(17)                  | 1.750(3)   | Mo(6)- O(18)             | 1.694(3)   | Mo(6)- O(19) <sup>2</sup>    | 2.361(3)   |
| Mo(6)- O(19)                  | 2.134(3)   | Mo(6)- O(20)             | 1.963(3)   | Mo(6)- O(23) <sup>2</sup>    | 1.955(3)   |
| Mo(7)- O(16) <sup>2</sup>     | 1.911(3)   | Mo(7)- O(19)             | 2.300(3)   | Mo(7)- O(20)                 | 2.006(3)   |
| Mo(7)- O(21)                  | 1.710(3)   | Mo(7)- O(22)             | 1.695(3)   | Mo(7)- O(23)                 | 2.356(3)   |
| Mo(8)- O(19) <sup>2</sup>     | 2.358(3)   | Mo(8)- O(20)             | 2.318(3)   | Mo(8)- O(23)                 | 1.978(3)   |
| Mo(8)- O(24)                  | 1.692(3)   | Mo(8)- O(25)             | 1.734(3)   | Mo(8)- O(26)                 | 1.893(3)   |
| Co(1)-O(14) <sup>3</sup>      | 2.147(3)   | Co(1)-O(14)              | 2.147(3)   | Co(1)-O(25)                  | 2.129(3)   |
| Co(1)-O(25) <sup>3</sup>      | 2.129(3)   | Co(1)-O(27) <sup>3</sup> | 2.026(3)   | Co(1)-O(27)                  | 2.026(3)   |
| O(16)-Mo(7) <sup>2</sup>      | 1.911(3)   | O(19)-Mo(5) <sup>2</sup> | 2.476(3)   | O(19)-Mo(6) <sup>2</sup>     | 2.361(3)   |
| O(19)-Mo(8) <sup>2</sup>      | 2.358(3)   | O(23)-Mo(6) <sup>2</sup> | 1.955(3)   |                              |            |
| O(1)-Mo(1)-O(3)               | 100.22(14) | O(1)-Mo(1)-O(6)          | 87.81(14)  | O(1)-Mo(1)-O(9) <sup>1</sup> | 100.76(14) |
| O(1)-Mo(1)-O(11) <sup>1</sup> | 164.86(14) | O(2)-Mo(1)-O(1)          | 105.35(17) | O(2)-Mo(1)-O(3)              | 99.79(14)  |

|                                               |            |                                              |            |                                              |            |
|-----------------------------------------------|------------|----------------------------------------------|------------|----------------------------------------------|------------|
| O(2)-Mo(1)-O(6)                               | 165.87(14) | O(2)-Mo(1)-O(9) <sup>1</sup>                 | 102.65(14) | O(2)-Mo(1)-O(11) <sup>1</sup>                | 89.65(14)  |
| O(3)-Mo(1)-O(6)                               | 72.27(11)  | O(3)-Mo(1)- O(11) <sup>1</sup>               | 78.76(11)  | O(9) <sup>1</sup> -Mo(1)-O(3)                | 143.79(13) |
| O(9) <sup>1</sup> -Mo(1)-O(6)                 | 79.40(11)  | O(9) <sup>1</sup> -Mo(1)- O(11) <sup>1</sup> | 73.37(12)  | O(11) <sup>1</sup> -Mo(1)-O(6)               | 77.46(11)  |
| O(3)-Mo(2)-O(6)                               | 71.75(11)  | O(3)-Mo(2)-O(13) <sup>1</sup>                | 78.14(12)  | O(4)-Mo(2)-O(3)                              | 100.48(14) |
| O(4)-Mo(2)-O(6)                               | 164.28(14) | O(4)-Mo(2)-O(7)                              | 102.36(15) | O(4)-Mo(2)-O(13) <sup>1</sup>                | 88.18(14)  |
| O(5)-Mo(2)-O(3)                               | 102.93(15) | O(5)-Mo(2)-O(4)                              | 105.95(16) | O(5)-Mo(2)-O(6)                              | 89.30(13)  |
| O(5)-Mo(2)-O(7)                               | 100.13(15) | O(5)-Mo(2)- O(13) <sup>1</sup>               | 165.22(13) | O(7)-Mo(2)-O(3)                              | 141.43(12) |
| O(7)-Mo(2)-O(6)                               | 78.09(11)  | O(7)-Mo(2)- O(13) <sup>1</sup>               | 71.99(12)  | O(13) <sup>1</sup> -Mo(2)-O(6)               | 76.95(10)  |
| O(7)-Mo(3)-O(11)                              | 78.13(11)  | O(7)-Mo(3)- O(13) <sup>1</sup>               | 72.30(12)  | O(8)-Mo(3)-O(7)                              | 103.36(14) |
| O(8)-Mo(3)-O(9)                               | 100.57(14) | O(8)-Mo(3)-O(11)                             | 165.46(14) | O(8)-Mo(3)- O(13) <sup>1</sup>               | 89.66(14)  |
| O(9)-Mo(3)-O(7)                               | 142.30(12) | O(9)-Mo(3)-O(11)                             | 71.69(11)  | O(9)-Mo(3)- O(13) <sup>1</sup>               | 79.20(12)  |
| O(10)-Mo(3)-O(7)                              | 100.52(15) | O(10)-Mo(3)-O(8)                             | 105.38(16) | O(10)-Mo(3)-O(9)                             | 100.68(15) |
| O(10)-Mo(3)-O(11)                             | 88.38(13)  | O(10)-Mo(3)- O(13) <sup>1</sup>              | 164.63(13) | O(13) <sup>1</sup> -Mo(3)-O(11)              | 76.94(10)  |
| O(6)-Mo(4)-O(11)                              | 109.66(14) | O(12)-Mo(4)-O(6)                             | 109.28(15) | O(12)-Mo(4)-O(11)                            | 109.72(15) |
| O(12)-Mo(4)-O(13)                             | 109.24(15) | O(13)-Mo(4)-O(6)                             | 109.27(14) | O(13)-Mo(4)-O(11)                            | 109.65(14) |
| O(14)-Mo(5)-O(16)                             | 100.52(13) | O(14)-Mo(5)-O(17)                            | 161.10(12) | O(14)-Mo(5)-O(19) <sup>2</sup>               | 91.64(12)  |
| O(14)-Mo(5)-O(26)                             | 93.99(13)  | O(15)-Mo(5)-O(14)                            | 104.92(15) | O(15)-Mo(5)-O(16)                            | 103.20(14) |
| O(15)-Mo(5)-O(17)                             | 93.50(13)  | O(15)-Mo(5)-O(19) <sup>2</sup>               | 163.44(13) | O(15)-Mo(5)-O(26)                            | 103.52(14) |
| O(16)-Mo(5)-O(17)                             | 78.87(11)  | O(16)-Mo(5)-O(19) <sup>2</sup>               | 73.56(11)  | O(16)-Mo(5)-O(26)                            | 145.01(12) |
| O(17)-Mo(5)-O(19) <sup>2</sup>                | 69.95(10)  | O(26)-Mo(5)-O(17)                            | 77.34(11)  | O(17)-Mo(5)- O(19) <sup>2</sup>              | 74.37(11)  |
| O(17)-Mo(6)- Mo(7)                            | 133.81(9)  | O(17)-Mo(6)-O(19) <sup>2</sup>               | 80.78(12)  | O(17)-Mo(6)-O(19)                            | 156.17(12) |
| O(17)-Mo(6)-O(20)                             | 97.46(12)  | O(17)-Mo(6)-O(23) <sup>2</sup>               | 96.10(12)  | O(18)-Mo(6)-Mo(7)                            | 89.90(10)  |
| O(18)-Mo(6)-O(17)                             | 104.76(14) | O(18)-Mo(6)- O(19) <sup>2</sup>              | 174.46(13) | O(18)-Mo(6)- O(19)                           | 99.06(13)  |
| O(18)-Mo(6)-O(20)                             | 100.67(13) | O(18)-Mo(6)- O(23) <sup>2</sup>              | 101.32(13) | O(19) <sup>2</sup> -Mo(6)-Mo(7)              | 86.19(7)   |
| O(19)-Mo(6)-Mo(7)                             | 45.60(7)   | O(19)-Mo(6)- O(19) <sup>2</sup>              | 75.39(11)  | O(20)-Mo(6)-Mo(7)                            | 36.36(8)   |
| O(20)-Mo(6)- O(19)                            | 78.41(11)  | O(20)-Mo(6)- O(19) <sup>2</sup>              | 78.42(10)  | O(23) <sup>2</sup> -Mo(6)-Mo(7)              | 124.09(8)  |
| O(23) <sup>2</sup> -Mo(6)- O(19) <sup>2</sup> | 77.76(10)  | O(23) <sup>2</sup> -Mo(6)- O(19)             | 78.49(11)  | O(23) <sup>2</sup> -Mo(6)- O(20)             | 150.21(12) |
| O(16) <sup>2</sup> -Mo(7)-Mo(6)               | 119.41(8)  | O(16) <sup>2</sup> -Mo(7)- O(19)             | 77.95(11)  | O(16) <sup>2</sup> -Mo(7)- O(20)             | 147.90(11) |
| O(16) <sup>2</sup> -Mo(7)- O(23)              | 86.06(11)  | O(19) -Mo(7)-Mo(6)                           | 41.52(7)   | O(19) -Mo(7)-O(23)                           | 71.71(9)   |
| O(20) -Mo(7)-Mo(6)                            | 35.45(8)   | O(20) -Mo(7)-O(19)                           | 73.68(10)  | O(20) -Mo(7)-O(23)                           | 71.12(11)  |
| O(21) -Mo(7)- Mo(6)                           | 84.98(10)  | O(21) -Mo(7)- O(16) <sup>2</sup>             | 101.13(14) | O(21) -Mo(7)-O(19)                           | 95.01(12)  |
| O(21) -Mo(7)-O(20)                            | 96.04(13)  | O(21) -Mo(7)-O(23)                           | 163.44(12) | O(22) -Mo(7)- Mo(6)                          | 135.58(11) |
| O(22) -Mo(7)- O(16) <sup>2</sup>              | 101.35(14) | O(22) -Mo(7)-O(19)                           | 159.79(13) | O(22) -Mo(7)-O(20)                           | 100.15(13) |
| O(22) -Mo(7)-O(21)                            | 104.86(15) | O(22) -Mo(7)-O(23)                           | 88.08(12)  | O(23) -Mo(7)- Mo(6)                          | 78.51(7)   |
| O(20)-Mo(8)- O(19) <sup>2</sup>               | 72.08(9)   | O(23)-Mo(8)- O(19) <sup>2</sup>              | 72.79(10)  | O(23)-Mo(8)- O(20)                           | 72.45(11)  |
| O(24)-Mo(8)- O(19) <sup>2</sup>               | 164.31(13) | O(24)-Mo(8)- O(20)                           | 92.27(12)  | O(24)-Mo(8)- O(23)                           | 102.05(13) |
| O(24)-Mo(8)- O(25)                            | 105.27(14) | O(24)-Mo(8)- O(26)                           | 101.06(14) | O(25)-Mo(8)- O(19) <sup>2</sup>              | 90.30(12)  |
| O(25)-Mo(8)- O(20)                            | 162.12(12) | O(25)-Mo(8)- O(23)                           | 99.93(13)  | O(25)-Mo(8)- O(26)                           | 98.49(13)  |
| O(26)-Mo(8)- O(19) <sup>2</sup>               | 78.00(11)  | O(26)-Mo(8)- O(20)                           | 81.17(11)  | O(26)-Mo(8)- O(23)                           | 145.33(12) |
| O(14)-Co(1)-O(14) <sup>3</sup>                | 180.0      | O(25)-Co(1)-O(14) <sup>3</sup>               | 96.74(11)  | O(25) <sup>3</sup> -Co(1)-O(14) <sup>3</sup> | 83.26(11)  |
| O(25)-Co(1)-O(14)                             | 83.26(11)  | O(25) <sup>3</sup> -Co(1)-O(14)              | 96.74(11)  | O(25)-Co(1)-O(25) <sup>3</sup>               | 180.0      |
| O(27)-Co(1)-O(14) <sup>3</sup>                | 87.67(13)  | O(27)-Co(1)-O(14)                            | 92.33(13)  | O(27) <sup>3</sup> -Co(1)-O(14) <sup>3</sup> | 92.33(13)  |
| O(27) <sup>3</sup> -Co(1)-O(14)               | 87.67(13)  | O(27)-Co(1)-O(25)                            | 89.23(12)  | O(27) <sup>3</sup> -Co(1)-O(25)              | 90.77(12)  |
| O(27)-Co(1)-O(25) <sup>3</sup>                | 90.77(12)  | O(27) <sup>3</sup> -Co(1)-O(25) <sup>3</sup> | 89.23(12)  | O(27)-Co(1)- O(27) <sup>3</sup>              | 180.0      |

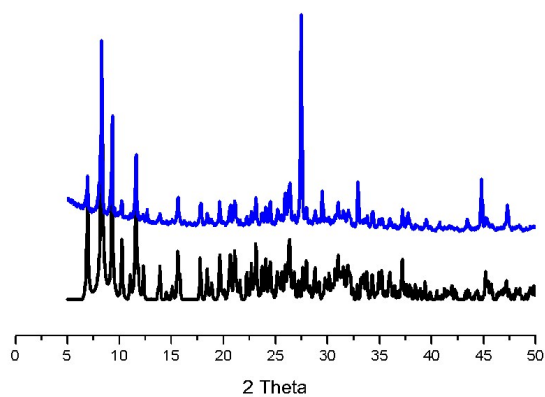

**Fig. S1.** Powder X-ray diffraction (PXRD) patterns for **1**. Blue: experimental data ; black: simulated pattern from single-crystal X-ray structure data.

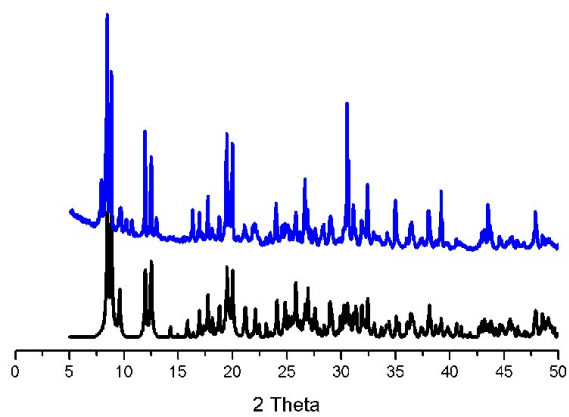

**Fig. S2.** Powder X-ray diffraction (PXRD) patterns for **2**. Blue: experimental data ; black: simulated pattern from single-crystal X-ray structure data.

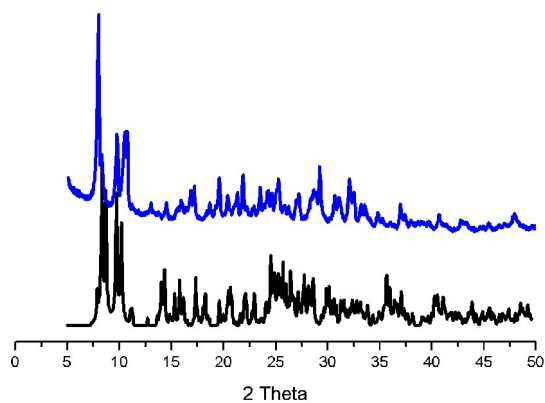

**Fig. S3.** Powder X-ray diffraction (PXRD) patterns for **3**. Blue: experimental data ; black: simulated pattern from single-crystal X-ray structure data.

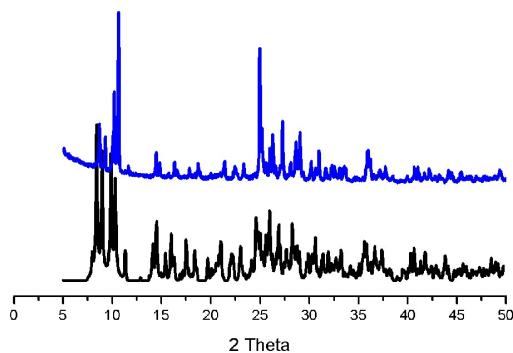

**Fig. S4.** Powder X-ray diffraction (PXRD) patterns for **4**. Blue: experimental data ; black: simulated pattern from single-crystal X-ray structure data.

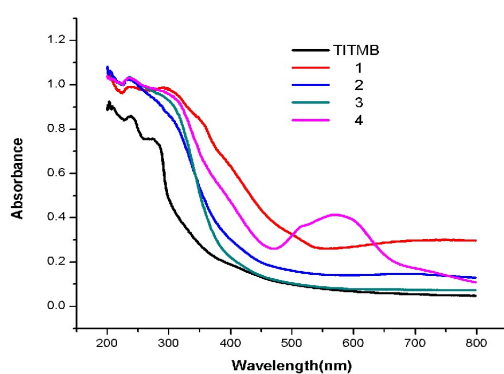

**Fig. S5** UV/Vis absorption spectra of ligand TITMB and compounds **1**, **2**, **3** and **4**.

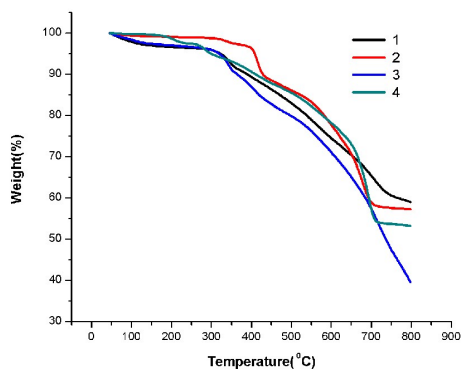

**Fig. S6** TG plot of compounds **1** to **4**.

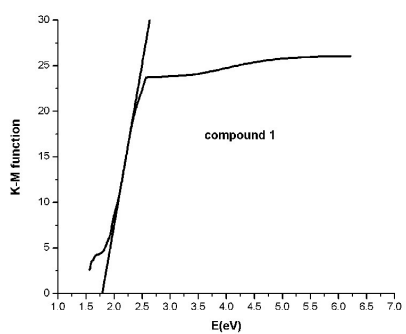

(a)

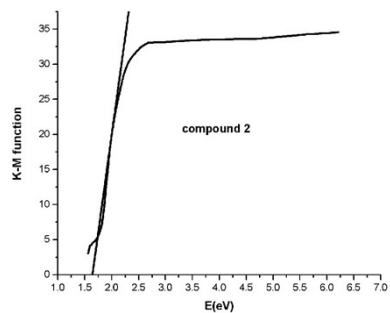

(b)

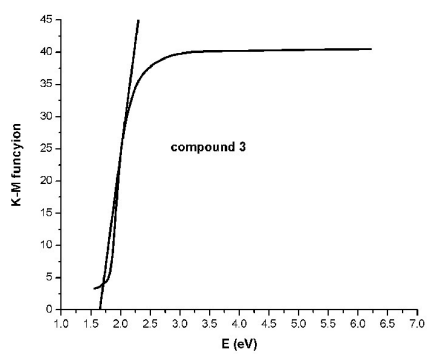

(c)

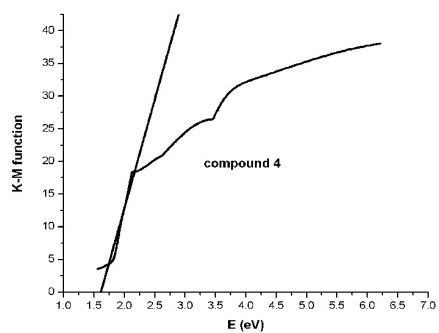

(d)

**Fig. S7** K-M function versus energy (eV) curve compounds **1**, **2**, **3** and **4**.



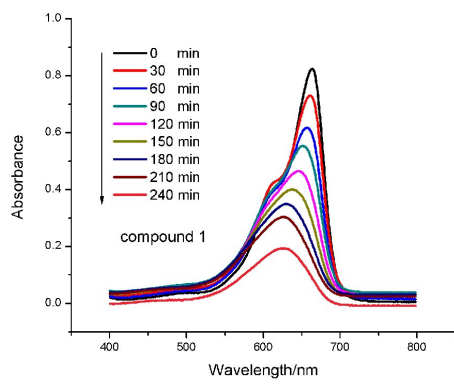

(a)

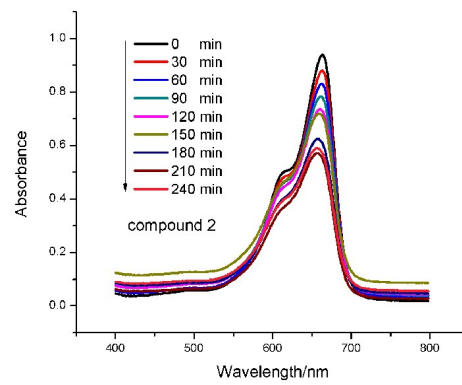

(b)

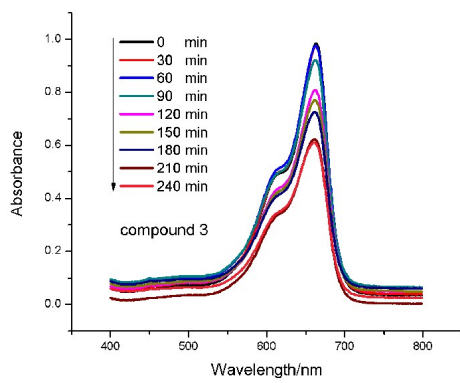

(c)

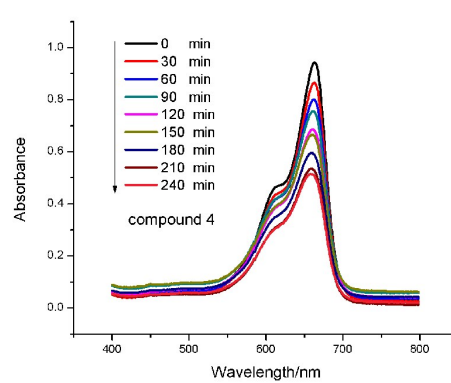

(d)

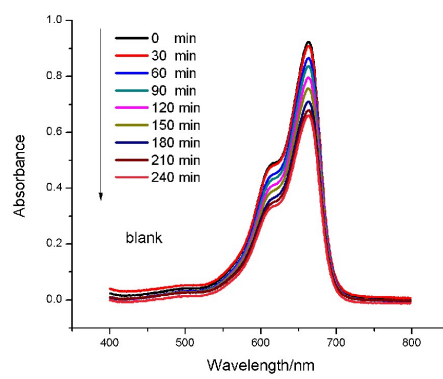

**Fig.S8** Absorption spectra of the MB aqueous solution during the decomposition reaction with the use of compounds **1** (a), **2** (b), **3** (c), **4** (d) and **blank** (e).

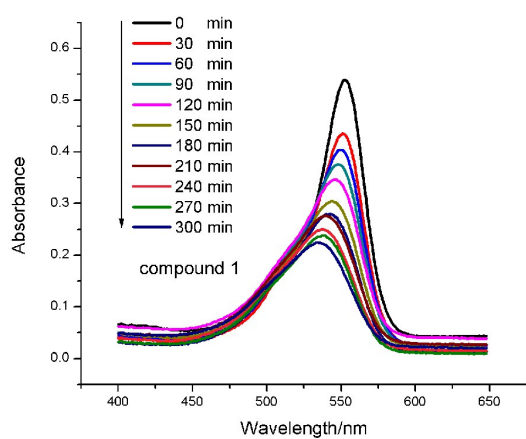

(a)

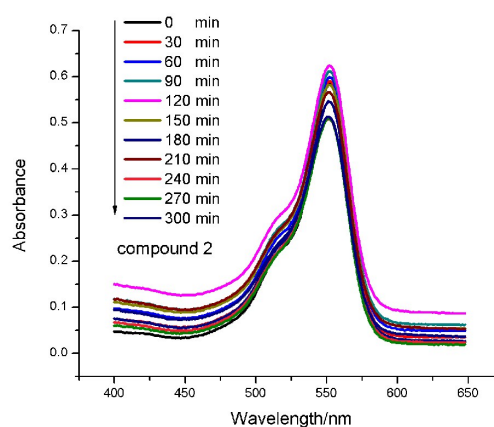

(b)

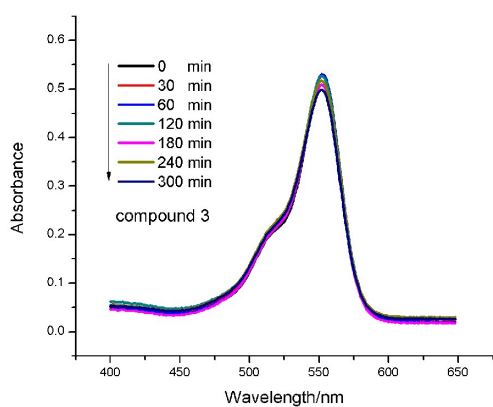

(c)

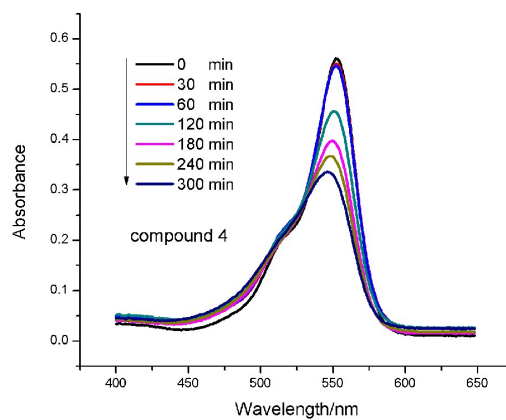

(d)

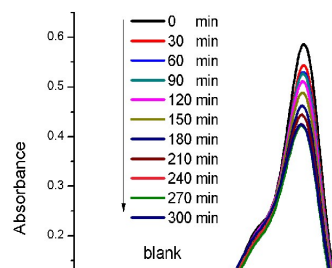

**Fig.S9** Absorption spectra of the RhB aqueous solution during the decomposition reaction with the use of compounds **1** (a), **2** (b), **3** (c), **4** (d) and **blank** (e).

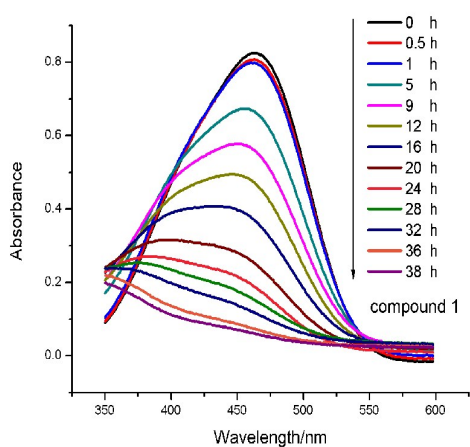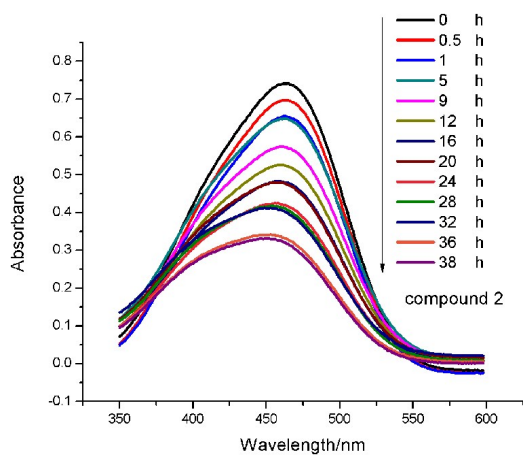

(a)

(b)

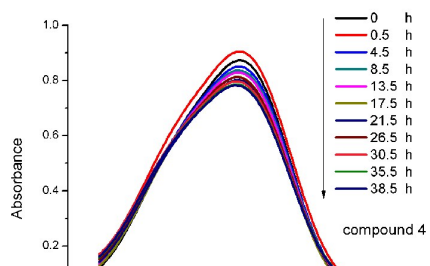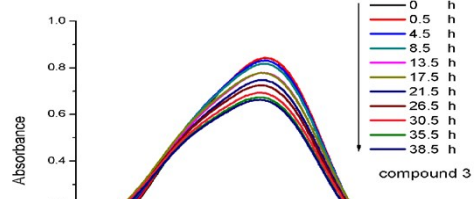

**Fig.S10** Absorption spectra of the MO aqueous solution during the decomposition reaction with the use of compounds **1** (a), **2** (b), **3** (c), **4** (d) and **blank** (e).
